# Supplementary material for: Characteristic single glucosinolates from Moringa oleifera: Induction of detoxifying enzymes and lack of genotoxic activity in various model systems
Source: Royal Society of Chemistry journal article supplement (doi:10.1039/c6fo01231k), 2016-01-01

glucosinolate

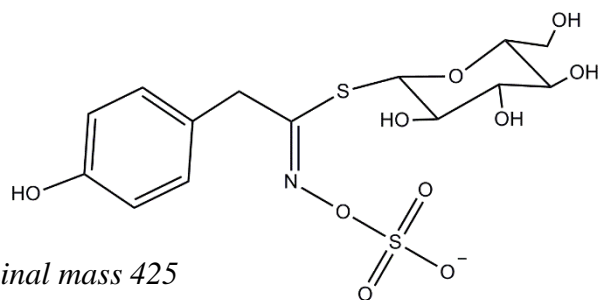

myrosinase

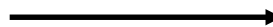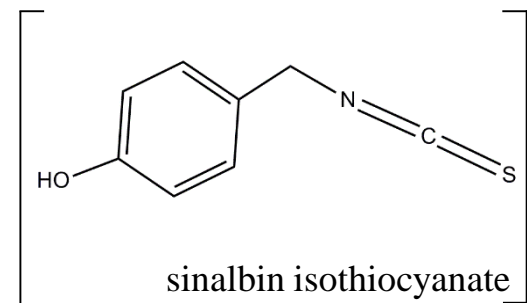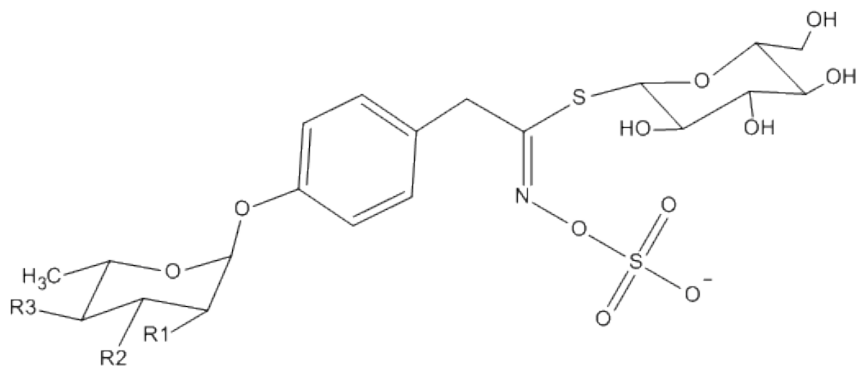

myrosinase

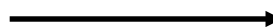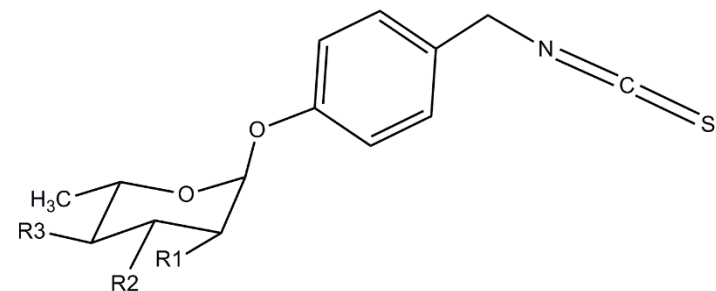

4- $\alpha$ -rhamnopyranosyloxy-benzyl glucosinolate

(R1, R2, R3 = OH), *nominal mass 571*

acetyl-4- $\alpha$ -rhamnopyranosyloxy-benzyl glucosinolate

(R1, R2, or R3 = OAc), *nominal mass 613*

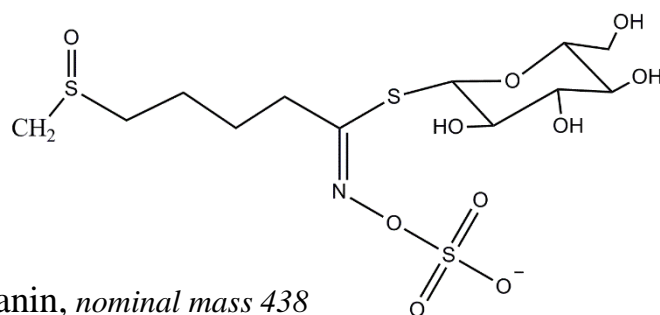

myrosinase

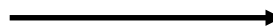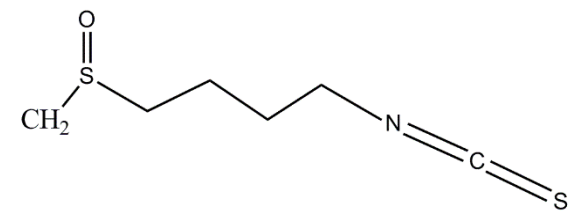

Supplement: c6fo01231k2.pdf [file c6fo01231k2.pdf]
